# Supplementary material for: Buffalo milk transcriptome: A comparative analysis of early, mid and late lactation
Source: PubMed Central journal article supplement (PMC6461664; doi:10.1038/s41598-019-42513-2), 2019-04-12
Supplement: 41598_2019_42513_MOESM1_ESM.pdf [file 41598_2019_42513_MOESM1_ESM.pdf]

**Supplementary Information**

**(Revised manuscript)**

**Buffalo milk transcriptome: A comparative analysis of early, mid and late lactation**

***Reena Arora\**, *Anju Sharma*, *Upasna Sharma*, *Yashila Girdhar*, *Mandeep Kaur*, *Purna Kapoor Sonika*  
*Ahlawat and Ramesh Kumar Vijn***

***ICAR-National Bureau of Animal Genetic Resources, Karnal-132001, Haryana***

**\*Corresponding author: [rejagati@gmail.com](mailto:rejagati@gmail.com)**

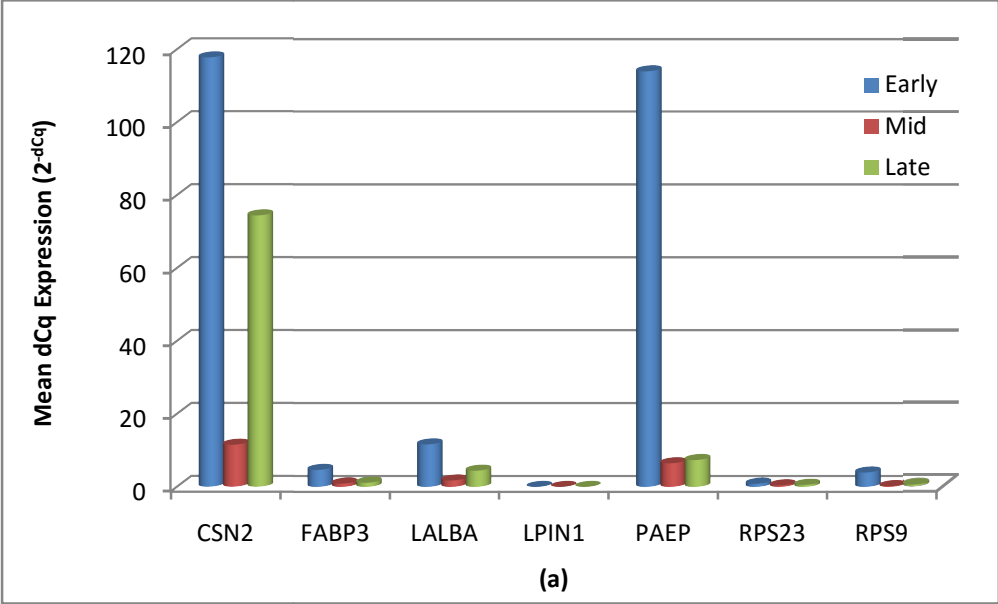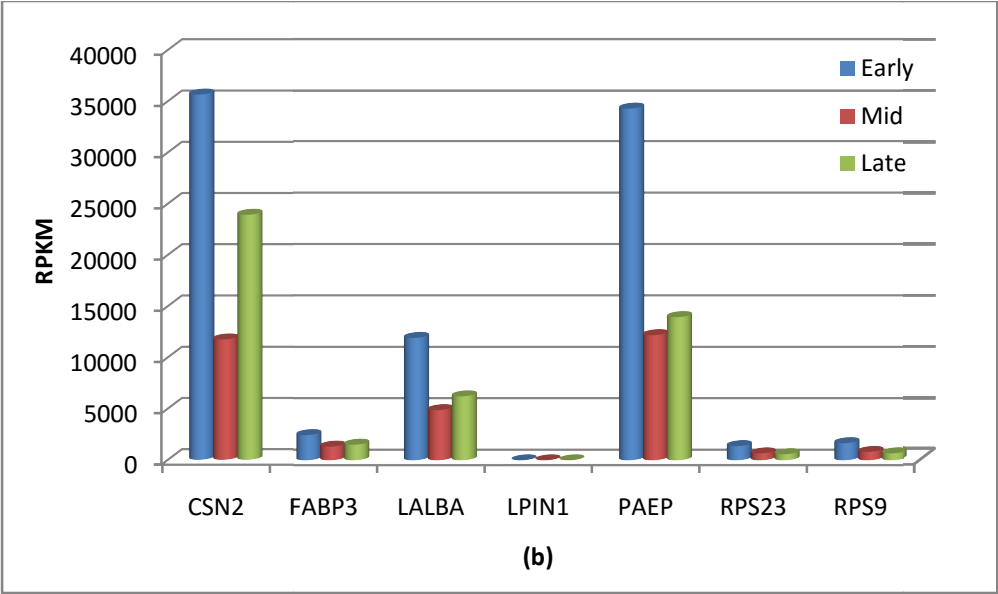

**Supplementary Figure 1.** Validation of DEGs by qPCR, (a) Mean dCq Expression values for selected genes (b) RPKM values for selected genes and reference genes
